# Supplementary material for: Increased Soil Aggregate Stability by Altering Contents and Chemical Composition of Organic Carbon Fractions via Seven Years of Manure Addition in Mollisols
Source: MDPI journal article supplement (doi:10.3390/agriculture13010088), 2022-12-28
Supplement: s1 [file s1]

**Table S5.** The physical and chemical properties of topsoil (0-20 cm) under different fertilization measures before and after crop harvest.

|                                               | Treatments | pH value     | Bulk density<br>(g cm <sup>-1</sup> ) | SOC<br>(g kg <sup>-1</sup> ) | Total N<br>(g kg <sup>-1</sup> ) | NH <sub>4</sub> <sup>+</sup> -N<br>(mg kg <sup>-1</sup> ) | NO <sub>3</sub> <sup>-</sup> -N<br>(mg kg <sup>-1</sup> ) | Olsen-P<br>(mg kg <sup>-1</sup> ) | Available K<br>(mg kg <sup>-1</sup> ) | MBC<br>(mg kg <sup>-1</sup> ) | MBN<br>(mg kg <sup>-1</sup> ) |
|-----------------------------------------------|------------|--------------|---------------------------------------|------------------------------|----------------------------------|-----------------------------------------------------------|-----------------------------------------------------------|-----------------------------------|---------------------------------------|-------------------------------|-------------------------------|
| Before crop<br>harvest                        | NoF        | 6.08±0.012 c | 1.41±0.006 a                          | 24.5±0.289 c                 | 2.15±0.0116 d                    | 63.3±1.15 a                                               | 16.4±0.269 d                                              | 62.4±0.58 d                       | 275±10.8 c                            | 283±5.8 b                     | 15.2±0.53 d                   |
|                                               | CF         | 5.68±0.014 d | 1.40±0.007 a                          | 27.2±0.297 b                 | 2.25±0.0157 c                    | 66.4±1.23 a                                               | 20.9±0.231 c                                              | 98.5±1.05 c                       | 258±12.3 c                            | 295±7.6 b                     | 21.3±0.58 c                   |
|                                               | CF+DM      | 6.74±0.015 b | 1.27±0.006 b                          | 31.2±0.314 a                 | 2.85±0.0142 b                    | 63.6±1.19 a                                               | 30.1±0.217 b                                              | 131.3±1.42 b                      | 409±11.5 b                            | 335±10.7 a                    | 30.6±1.09 b                   |
|                                               | CF+2DM     | 7.05±0.011 a | 1.28±0.005 b                          | 32.4±0.326 a                 | 3.50±0.0134 a                    | 62.9±1.26 a                                               | 36.3±0.199 a                                              | 196.5±1.97 a                      | 575±13.4 a                            | 323±11.3 a                    | 37.9±1.17 a                   |
| After crop<br>harvest                         | NoF        | 6.11±0.010 c | 1.39±0.008 a                          | 25.0±0.318 c                 | 2.17±0.0175 d                    | 65.2±1.31 a                                               | 16.7±0.277 d                                              | 67.8±1.15 d                       | 287±10.5 c                            | 308±9.2 b                     | 15.9±0.64 d                   |
|                                               | CF         | 5.75±0.009 d | 1.37±0.006 a                          | 27.8±0.376 b                 | 2.28±0.0183 c                    | 67.9±1.18 a                                               | 21.2±0.312 c                                              | 103.4±1.73 c                      | 269±14.2 c                            | 310±10.1 b                    | 21.8±0.71 c                   |
|                                               | CF+DM      | 6.92±0.012 b | 1.21±0.007 b                          | 32.7±0.260 a                 | 3.02±0.0206 b                    | 65.8±1.22 a                                               | 32.4±0.305 b                                              | 159.6±2.89 b                      | 441±13.1 b                            | 370±11.8 a                    | 36.7±1.04 b                   |
|                                               | CF+2DM     | 7.16±0.016 a | 1.22±0.004 b                          | 33.9±0.321 a                 | 3.68±0.0289 a                    | 65.1±1.13 a                                               | 38.9±0.346 a                                              | 228.7±4.62 a                      | 605±15.5 a                            | 353±14.2 a                    | 44.5±1.22 a                   |
| <i>P</i> value<br>(Significant<br>difference) | NoF        | 0.503 ns     | 0.288 ns                              | 0.276 ns                     | 0.293 ns                         | 0.309 ns                                                  | 0.503 ns                                                  | 0.256 ns                          | 0.122 ns                              | 0.086 ns                      | 0.162 ns                      |
|                                               | CF         | 0.162 ns     | 0.140 ns                              | 0.216 ns                     | 0.143 ns                         | 0.410 ns                                                  | 0.518 ns                                                  | 0.296 ns                          | 0.131 ns                              | 0.276 ns                      | 0.284 ns                      |
|                                               | CF+DM      | <0.001 **    | 0.002 **                              | 0.017 *                      | <0.001 **                        | 0.249 ns                                                  | 0.003 **                                                  | 0.001 **                          | 0.122 ns                              | 0.013 *                       | 0.020 *                       |
|                                               | CF+2DM     | 0.003 **     | 0.002 **                              | 0.026 *                      | 0.012 *                          | 0.249 ns                                                  | 0.004 **                                                  | 0.004 **                          | 0.140 ns                              | 0.021*                        | 0.016 *                       |

Note: Different lowercase letters exhibit significant differences among the different treatment for each crop growth stage at the  $P < 0.05$  level via Tukey's HSD test. \* and \*\* indicate significant differences between before and after crop harvest with the same treatment at  $P < 0.05$  and  $P < 0.01$  levels by independent-samples T test, respectively. ns represents no significant difference between before and after crop harvest with the same treatment ( $P > 0.05$ ). MBC and MBN indicate microbial biomass carbon and nitrogen, respectively.
