# Supplementary material for: Increased Soil Aggregate Stability by Altering Contents and Chemical Composition of Organic Carbon Fractions via Seven Years of Manure Addition in Mollisols
Source: MDPI journal article supplement (doi:10.3390/agriculture13010088), 2022-12-28
Supplement: s1 [file s1]

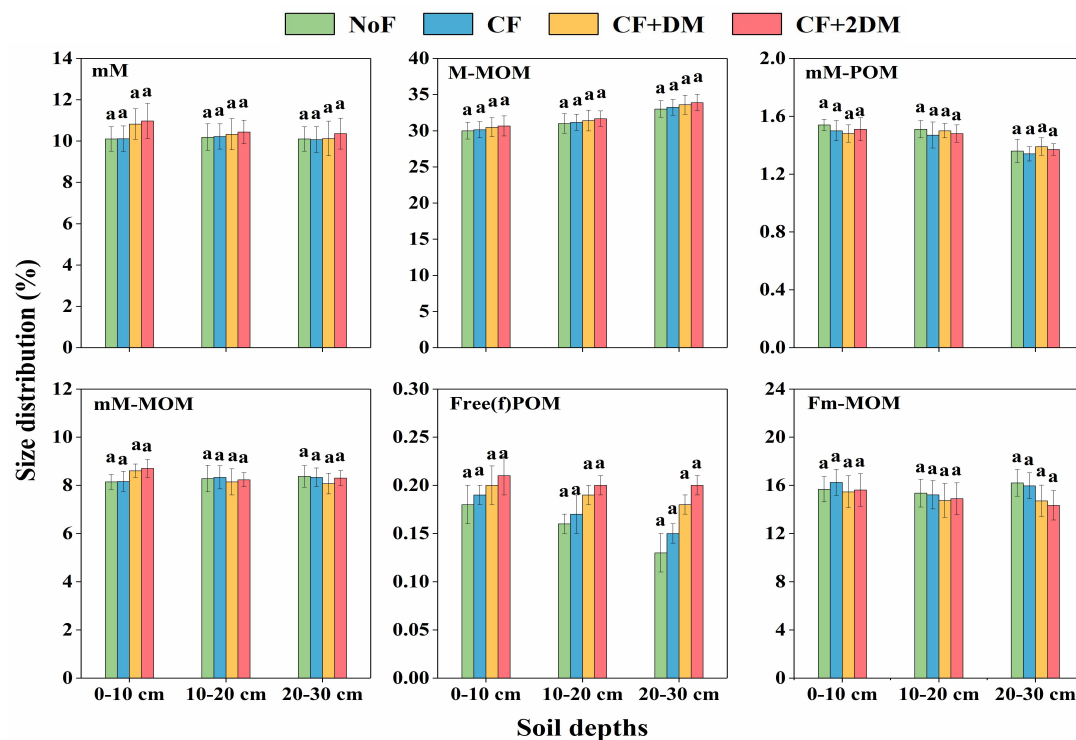

**Figure S2.** Size distribution of soil hierarchical aggregates under different fertilization practices. Vertical bars represent standard deviation of the mean. Different lowercase letters within the same fraction represent significant ( $P < 0.05$ ) differences among the different treatments in the same soil depth (Tukey's HSD test). NoF, non-fertilizer. CF, only chemical fertilizer. CF+DM, chemical fertilizer plus with single dairy manure. CF+2DM, chemical fertilizer plus with double dairy manure. The specific meanings of organic matter fractions with abbreviation were presented in Table 1.
