# Supplementary material for: Increased Soil Aggregate Stability by Altering Contents and Chemical Composition of Organic Carbon Fractions via Seven Years of Manure Addition in Mollisols
Source: MDPI journal article supplement (doi:10.3390/agriculture13010088), 2022-12-28
Supplement: s1 [file s1]

**Table S4.** Fertilization effects on relative peak area (%) of characteristic peaks in organic matter fractions within free microaggregates in physical-chemical combined grouping in FTIR analysis of Mollisols.

| Soil depths | Components | Treatments | Alcohol and phenol<br>-OH<br>3623 cm <sup>-1</sup> | Aliphatic<br>-CH-<br>2920 cm <sup>-1</sup> | Aromatic<br>C=C<br>1620 cm <sup>-1</sup> | Carbohydrate<br>C-O<br>1030 cm <sup>-1</sup> | 1620/2920   |
|-------------|------------|------------|----------------------------------------------------|--------------------------------------------|------------------------------------------|----------------------------------------------|-------------|
| 0-10 cm     | Fm-POM     | NoF        | 12.68±0.29 c                                       | 2.03±0.03 c                                | 4.81±0.06 d                              | 80.48±0.59 a                                 | 2.37±0.01 b |
|             |            | CF         | 11.46±0.27 bc                                      | 2.10±0.03 bc                               | 5.02±0.05 c                              | 81.42±0.58 a                                 | 2.39±0.02 b |
|             |            | CF+DM      | 10.51±0.24 b                                       | 2.16±0.04 ab                               | 5.28±0.07 b                              | 82.05±0.62 a                                 | 2.44±0.02 a |
|             |            | CF+2DM     | 10.22±0.23 a                                       | 2.24±0.04 a                                | 5.52±0.07 a                              | 82.02±0.64 a                                 | 2.46±0.01 a |
|             | Fm-MOM     | NoF        | 12.06±0.28 a                                       | 2.18±0.02 c                                | 4.84±0.05 d                              | 80.92±0.61 a                                 | 2.22±0.01 b |
|             |            | CF         | 11.06±0.26 ab                                      | 2.25±0.03 bc                               | 5.05±0.06 c                              | 81.64±0.63 a                                 | 2.24±0.01 b |
|             |            | CF+DM      | 10.02±0.31 b                                       | 2.34±0.03 ab                               | 5.42±0.06 b                              | 82.22±0.60 a                                 | 2.32±0.02 a |
|             |            | CF+2DM     | 9.87±0.24 b                                        | 2.42±0.04 a                                | 5.63±0.07 a                              | 82.08±0.57 a                                 | 2.33±0.02 a |
| 10-20 cm    | Fm-POM     | NoF        | 12.08±0.29 a                                       | 2.12±0.02 c                                | 4.86±0.05 d                              | 80.94±0.54 a                                 | 2.29±0.01 b |
|             |            | CF         | 11.05±0.27 ab                                      | 2.19±0.03 bc                               | 5.04±0.06 c                              | 81.72±0.55 a                                 | 2.30±0.01 b |
|             |            | CF+DM      | 10.29±0.31 b                                       | 2.25±0.03 ab                               | 5.36±0.07 b                              | 82.10±0.58 a                                 | 2.38±0.02 a |
|             |            | CF+2DM     | 10.06±0.32 b                                       | 2.33±0.04 a                                | 5.57±0.07 a                              | 82.04±0.61 a                                 | 2.39±0.02 a |
|             | Fm-MOM     | NoF        | 11.98±0.28 a                                       | 2.23±0.03 c                                | 4.98±0.05 d                              | 80.81±0.55 a                                 | 2.23±0.01 b |
|             |            | CF         | 10.94±0.29 ab                                      | 2.32±0.02 bc                               | 5.22±0.06 c                              | 81.52±0.52 a                                 | 2.25±0.01 b |
|             |            | CF+DM      | 9.85±0.31 bc                                       | 2.39±0.03 ab                               | 5.48±0.06 b                              | 82.28±0.56 a                                 | 2.29±0.02 a |
|             |            | CF+2DM     | 9.69±0.25 c                                        | 2.47±0.04 a                                | 5.69±0.07 a                              | 82.15±0.57 a                                 | 2.30±0.03 a |
| 20-30 cm    | Fm-POM     | NoF        | 11.87±0.28 a                                       | 2.18±0.03 b                                | 5.00±0.05 b                              | 80.95±0.58 a                                 | 2.29±0.01 b |
|             |            | CF         | 10.96±0.29 ab                                      | 2.27±0.04 ab                               | 5.21±0.06 b                              | 81.56±0.59 a                                 | 2.30±0.01 b |
|             |            | CF+DM      | 10.18±0.26 b                                       | 2.34±0.04 a                                | 5.48±0.06 a                              | 82.00±0.62 a                                 | 2.34±0.02 a |
|             |            | CF+2DM     | 9.96±0.21 b                                        | 2.39±0.05 a                                | 5.65±0.07 a                              | 82.00±0.64 a                                 | 2.36±0.02 a |
|             | Fm-MOM     | NoF        | 11.75±0.25 a                                       | 2.29±0.03 c                                | 5.02±0.05 b                              | 80.94±0.54 a                                 | 2.19±0.01 b |
|             |            | CF         | 10.69±0.27 ab                                      | 2.37±0.03 bc                               | 5.23±0.05 b                              | 81.71±0.55 a                                 | 2.21±0.01 b |
|             |            | CF+DM      | 9.67±0.29 b                                        | 2.46±0.04 ab                               | 5.54±0.06 a                              | 82.33±0.52 a                                 | 2.25±0.02 a |
|             |            | CF+2DM     | 9.58±0.26 b                                        | 2.52±0.04 a                                | 5.72±0.07 a                              | 82.18±0.60 a                                 | 2.27±0.03 a |

Note: Different lowercase letters within the same column represent significant differences for each soil layer in the same component ( $P < 0.05$ , Tukey's HSD test).
