# Supplementary material for: Increased Soil Aggregate Stability by Altering Contents and Chemical Composition of Organic Carbon Fractions via Seven Years of Manure Addition in Mollisols
Source: MDPI journal article supplement (doi:10.3390/agriculture13010088), 2022-12-28
Supplement: s1 [file s1]

**Table S1.** Fertilization effects on relative peak area (%) of characteristic peaks observed in the FTIR analysis of bulk Mollisols.

| Soil depths | Treatments | Alcohol and phenol<br>-OH<br>3623 cm <sup>-1</sup> | Aliphatic<br>-CH-<br>2920 cm <sup>-1</sup> | Aromatic<br>C=C<br>1620 cm <sup>-1</sup> | Carbohydrate<br>C-O<br>1030 cm <sup>-1</sup> | 1620/2920   |
|-------------|------------|----------------------------------------------------|--------------------------------------------|------------------------------------------|----------------------------------------------|-------------|
| 0-10 cm     | NoF        | 11.24±0.29 a                                       | 2.07±0.06 b                                | 4.19±0.05 c                              | 82.50±0.58 a                                 | 2.02±0.03 b |
|             | CF         | 10.98±0.27 a                                       | 2.14±0.07 ab                               | 4.39±0.06 c                              | 82.49±0.56 a                                 | 2.05±0.03 b |
|             | CF+DM      | 10.18±0.31 a                                       | 2.25±0.07 ab                               | 4.84±0.09 b                              | 82.73±0.51 a                                 | 2.15±0.04 a |
|             | CF+2DM     | 10.05±0.30 a                                       | 2.38±0.08 a                                | 5.14±0.11 a                              | 82.43±0.52 a                                 | 2.16±0.04 a |
| 10-20 cm    | NoF        | 11.15±0.34 a                                       | 2.15±0.07 a                                | 4.25±0.07 b                              | 82.45±0.55 a                                 | 1.98±0.02 b |
|             | CF         | 10.78±0.28 a                                       | 2.23±0.08 a                                | 4.42±0.07 b                              | 82.57±0.54 a                                 | 1.98±0.03 b |
|             | CF+DM      | 10.04±0.22 a                                       | 2.31±0.08 a                                | 5.07±0.08 a                              | 82.58±0.57 a                                 | 2.19±0.03 a |
|             | CF+2DM     | 9.96±0.21 a                                        | 2.37±0.07 a                                | 5.26±0.09 a                              | 82.41±0.52 a                                 | 2.22±0.04 a |
| 20-30 cm    | NoF        | 11.09±0.26 a                                       | 2.29±0.07 a                                | 4.29±0.06 b                              | 82.33±0.53 a                                 | 1.87±0.02 b |
|             | CF         | 10.52±0.25 a                                       | 2.36±0.06 a                                | 4.48±0.06 b                              | 82.64±0.59 a                                 | 1.90±0.02 b |
|             | CF+DM      | 9.98±0.04 a                                        | 2.42±0.08 a                                | 5.19±0.08 a                              | 82.41±0.61 a                                 | 2.14±0.03 a |
|             | CF+2DM     | 9.85±0.23 a                                        | 2.49±0.09 a                                | 5.37±0.09 a                              | 82.29±0.62a                                  | 2.16±0.03 a |

Note: Different lowercase letters within the same column represent significant differences for each soil layer ( $P < 0.05$ , Tukey's HSD test).
