# Supplementary material for: Increased Soil Aggregate Stability by Altering Contents and Chemical Composition of Organic Carbon Fractions via Seven Years of Manure Addition in Mollisols
Source: MDPI journal article supplement (doi:10.3390/agriculture13010088), 2022-12-28
Supplement: s1 [file s1]

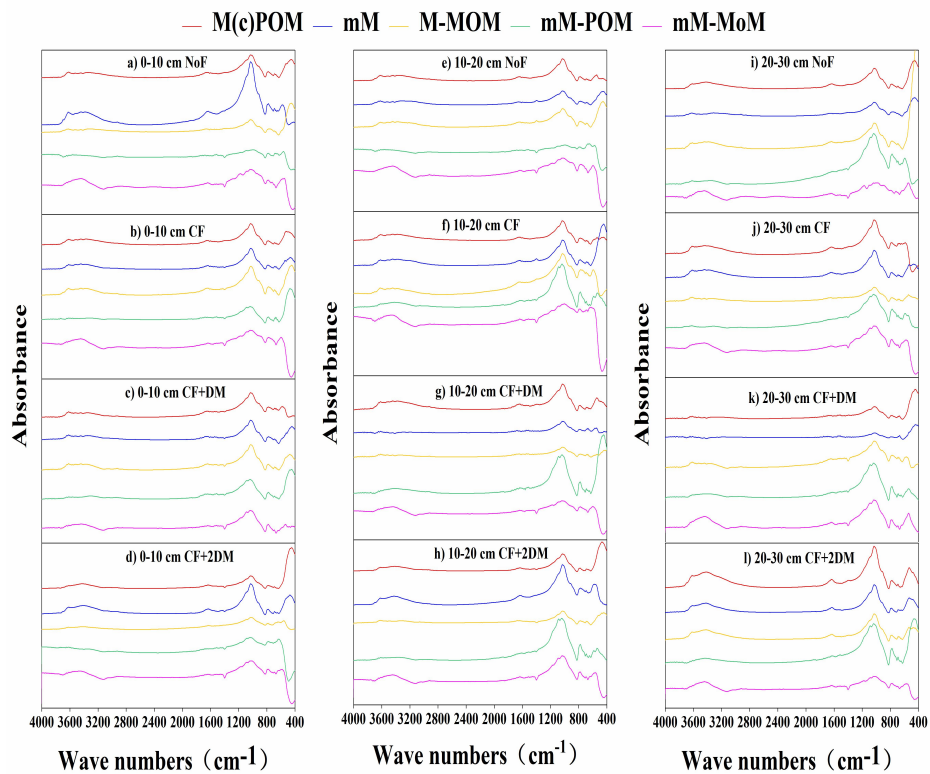

**Figure S5.** Fertilization effects on FTIR of organic matter components within macroaggregates of physical-chemical combined grouping in Mollisols.
