# Supplementary material for: Increased Soil Aggregate Stability by Altering Contents and Chemical Composition of Organic Carbon Fractions via Seven Years of Manure Addition in Mollisols
Source: MDPI journal article supplement (doi:10.3390/agriculture13010088), 2022-12-28
Supplement: s1 [file s1]

**Table S2.** Fertilization effects on relative peak area (%) of characteristic peaks in organic matter fractions with aggregate grouping in FTIR analysis of Mollisols.

| Soil depths | Components | Treatments | Alcohol and phenol<br>-OH<br>3623 cm <sup>-1</sup> | Aliphatic<br>-CH-<br>2920 cm <sup>-1</sup> | Aromatic<br>C=C<br>1620 cm <sup>-1</sup> | Carbohydrate<br>C-O<br>1030 cm <sup>-1</sup> | 1620/2920   |
|-------------|------------|------------|----------------------------------------------------|--------------------------------------------|------------------------------------------|----------------------------------------------|-------------|
| 0-10 cm     | M          | NoF        | 12.78±0.28 a                                       | 2.14±0.06 a                                | 4.75±0.05 d                              | 80.33±0.59 a                                 | 2.22±0.03 d |
|             |            | CF         | 11.60±0.26 b                                       | 2.19±0.07 a                                | 5.02±0.05 c                              | 81.19±0.56 a                                 | 2.29±0.04 c |
|             |            | CF+DM      | 10.62±0.24 bc                                      | 2.28±0.07 a                                | 5.38±0.06 b                              | 81.72±0.54 a                                 | 2.36±0.04 b |
|             |            | CF+2DM     | 10.23±0.30 c                                       | 2.35±0.08 a                                | 5.69±0.06 a                              | 81.73±0.60 a                                 | 2.42±0.03 a |
|             | Fm         | NoF        | 17.02±0.58 a                                       | 2.16±0.05 a                                | 4.87±0.07 c                              | 75.95±0.58 a                                 | 2.25±0.03 c |
|             |            | CF         | 16.54±0.56 a                                       | 2.23±0.06 a                                | 5.12±0.06 b                              | 76.11±0.55 a                                 | 2.30±0.03 b |
|             |            | CF+DM      | 15.05±0.59 a                                       | 2.31±0.06 a                                | 5.48±0.07 a                              | 77.16±0.52 a                                 | 2.37±0.04 a |
|             |            | CF+2DM     | 14.86±0.53 a                                       | 2.39±0.07 a                                | 5.69±0.08 a                              | 77.06±0.50 a                                 | 2.38±0.04 a |
|             | nA-MOM     | NoF        | 15.81±0.56 a                                       | 2.23±0.06 a                                | 4.96±0.06 d                              | 77.00±0.57 a                                 | 2.22±0.03 c |
|             |            | CF         | 15.70±0.57 a                                       | 2.29±0.06 a                                | 5.19±0.07 c                              | 76.82±0.56 a                                 | 2.27±0.03 b |
|             |            | CF+DM      | 14.25±0.53 a                                       | 2.36±0.07 a                                | 5.50±0.08 b                              | 77.89±0.52 a                                 | 2.33±0.03 a |
|             |            | CF+2DM     | 13.90±0.52 a                                       | 2.47±0.07 a                                | 5.79±0.08 a                              | 77.84±0.49 a                                 | 2.34±0.04 a |
| 10-20 cm    | M          | NoF        | 12.58±0.29 a                                       | 2.19±0.05 a                                | 4.84±0.05 c                              | 80.53±0.58 a                                 | 2.14±0.02 b |
|             |            | CF         | 11.11±0.27 b                                       | 2.26±0.06 a                                | 5.11±0.06 b                              | 81.46±0.56 a                                 | 2.15±0.01 b |
|             |            | CF+DM      | 10.26±0.25 b                                       | 2.37±0.06 a                                | 5.47±0.07 a                              | 81.90±0.55 a                                 | 2.31±0.02 a |
|             |            | CF+2DM     | 10.07±0.22 b                                       | 2.41±0.07 a                                | 5.58±0.08 a                              | 81.94±0.52 a                                 | 2.32±0.02 a |
|             | Fm         | NoF        | 16.91±0.57 a                                       | 2.25±0.03 b                                | 4.96±0.05 c                              | 75.88±0.49 a                                 | 2.20±0.01 c |
|             |            | CF         | 16.05±0.55 ab                                      | 2.29±0.02 b                                | 5.23±0.06 b                              | 76.43±0.51 a                                 | 2.28±0.01 b |
|             |            | CF+DM      | 14.96±0.52 ab                                      | 2.37±0.03 ab                               | 5.59±0.06 a                              | 77.08±0.53 a                                 | 2.36±0.02 a |
|             |            | CF+2DM     | 14.12±0.51 b                                       | 2.44±0.04 a                                | 5.78±0.07 a                              | 77.66±0.54 a                                 | 2.37±0.02 a |
|             | nA-MOM     | NoF        | 15.70±0.61 a                                       | 2.29±0.02 b                                | 5.04±0.06 c                              | 76.97±0.57 a                                 | 2.20±0.02 c |
|             |            | CF         | 15.62±0.60 a                                       | 2.35±0.03 b                                | 5.25±0.06 c                              | 76.78±0.54 a                                 | 2.23±0.02 b |
|             |            | CF+DM      | 14.18±0.57 a                                       | 2.41±0.03 ab                               | 5.59±0.05 b                              | 77.82±0.49 a                                 | 2.32±0.03 a |
|             |            | CF+2DM     | 13.58±0.53 a                                       | 2.52±0.04 a                                | 5.87±0.07 a                              | 78.03±0.51 a                                 | 2.19±0.01 a |
| 20-30 cm    | M          | NoF        | 12.37±0.28 a                                       | 2.26±0.03 c                                | 4.94±0.06 c                              | 80.43±0.58 a                                 | 2.19±0.01 b |
|             |            | CF         | 11.05±0.27 b                                       | 2.38±0.02 b                                | 5.23±0.07 b                              | 81.34±0.56 a                                 | 2.20±0.01 b |
|             |            | CF+DM      | 10.08±0.29 b                                       | 2.49±0.02 ab                               | 5.52±0.07 a                              | 81.91±0.52 a                                 | 2.22±0.01 a |
|             |            | CF+2DM     | 9.87±0.24 b                                        | 2.55±0.03 a                                | 5.69±0.08 a                              | 81.89±0.49 a                                 | 2.23±0.01 a |
|             | Fm         | NoF        | 16.59±0.57 a                                       | 2.32±0.03 b                                | 5.07±0.06 c                              | 76.02±0.56 a                                 | 2.23±0.01 d |
|             |            | CF         | 15.87±0.56 ab                                      | 2.37±0.03 b                                | 5.29±0.06 c                              | 76.47±0.58 a                                 | 2.31±0.01 c |
|             |            | CF+DM      | 14.58±0.54 ab                                      | 2.44±0.04 ab                               | 5.64±0.07 b                              | 77.34±0.54 a                                 | 2.34±0.02 b |
|             |            | CF+2DM     | 13.82±0.52 b                                       | 2.51±0.04 a                                | 5.87±0.08 a                              | 77.80±0.61 a                                 | 2.18±0.01 a |
|             | nA-MOM     | NoF        | 15.61±0.59 a                                       | 2.34±0.03 c                                | 5.11±0.06 d                              | 76.94±0.58 a                                 | 2.21±0.01 d |
|             |            | CF         | 15.47±0.55 a                                       | 2.42±0.03 bc                               | 5.34±0.07 c                              | 76.77±0.59 a                                 | 2.28±0.01 c |
|             |            | CF+DM      | 14.05±0.48 a                                       | 2.49±0.04 ab                               | 5.67±0.08 b                              | 77.79±0.61 a                                 | 2.33±0.02 b |
|             |            | CF+2DM     | 13.06±0.53 a                                       | 2.57±0.04 a                                | 5.98±0.08 a                              | 78.39±0.62 a                                 | 2.19±0.01 a |

Note: Different lowercase letters within the same column represent significant differences for each soil layer in the same component ( $P < 0.05$ , Tukey's HSD test).
