# Supplementary material for: Increased Soil Aggregate Stability by Altering Contents and Chemical Composition of Organic Carbon Fractions via Seven Years of Manure Addition in Mollisols
Source: MDPI journal article supplement (doi:10.3390/agriculture13010088), 2022-12-28
Supplement: s1 [file s1]

**Table S3.** Fertilization effects on relative peak area (%) of characteristic peaks in organic matter fractions within macroaggregates in physical-chemical combined grouping in FTIR analysis of Mollisols.

| Soil depths | Components | Treatments | Alcohol and phenol<br>-OH<br>3623 cm <sup>-1</sup> | Aliphatic<br>-CH-<br>2920 cm <sup>-1</sup> | Aromatic<br>C=C<br>1620 cm <sup>-1</sup> | Carbohydrate<br>C-O<br>1030 cm <sup>-1</sup> | 1620/2920   |
|-------------|------------|------------|----------------------------------------------------|--------------------------------------------|------------------------------------------|----------------------------------------------|-------------|
| 0-10 cm     | M(c)POM    | NoF        | 13.27±0.29 a                                       | 2.16±0.03 b                                | 5.55±0.06 c                              | 79.02±0.58 a                                 | 2.57±0.01 b |
|             |            | CF         | 12.09±0.27 b                                       | 2.25±0.03 b                                | 5.81±0.06 b                              | 79.85±0.56 a                                 | 2.58±0.01 b |
|             |            | CF+DM      | 10.85±0.28 c                                       | 2.37±0.03 a                                | 6.18±0.07 a                              | 80.60±0.54 a                                 | 2.61±0.01 a |
|             |            | CF+2DM     | 10.76±0.25 c                                       | 2.42±0.04 a                                | 6.34±0.08 a                              | 80.49±0.57 a                                 | 2.62±0.02 a |
|             | mM         | NoF        | 10.05±0.28 a                                       | 2.11±0.03 c                                | 4.72±0.05 d                              | 83.12±0.59 a                                 | 2.24±0.01 c |
|             |            | CF         | 9.85±0.26 a                                        | 2.17±0.03 bc                               | 4.89±0.04 c                              | 83.09±0.58 a                                 | 2.25±0.02 c |
|             |            | CF+DM      | 9.31±0.25 a                                        | 2.25±0.04 ab                               | 5.19±0.05 b                              | 83.25±0.56 a                                 | 2.31±0.02 b |
|             |            | CF+2DM     | 8.89±0.22 a                                        | 2.32±0.04 a                                | 5.42±0.06 a                              | 83.37±0.52 a                                 | 2.34±0.01 a |
|             | M-MOM      | NoF        | 11.97±0.29 a                                       | 2.08±0.03 b                                | 4.73±0.06 d                              | 81.22±0.56 a                                 | 2.27±0.01 c |
|             |            | CF         | 10.81±0.27 b                                       | 2.14±0.02 b                                | 4.92±0.06 c                              | 82.13±0.54 a                                 | 2.30±0.01 b |
|             |            | CF+DM      | 10.48±0.25 b                                       | 2.19±0.04 ab                               | 5.14±0.07 b                              | 82.19±0.52 a                                 | 2.35±0.02 a |
|             |            | CF+2DM     | 10.35±0.22 b                                       | 2.28±0.05 a                                | 5.38±0.08 a                              | 81.99±0.48 a                                 | 2.36±0.02 a |
|             | mM-POM     | NoF        | 8.37±0.29 a                                        | 2.20±0.03 b                                | 4.72±0.06 d                              | 84.71±0.59 a                                 | 2.15±0.01 c |
|             |            | CF         | 8.22±0.28 a                                        | 2.24±0.03 b                                | 4.83±0.05 c                              | 84.71±0.61 a                                 | 2.16±0.01 c |
|             |            | CF+DM      | 8.05±0.25 a                                        | 2.31±0.04 ab                               | 5.07±0.07 b                              | 84.57±0.63 a                                 | 2.19±0.01 b |
|             |            | CF+2DM     | 7.94±0.24 a                                        | 2.39±0.04 a                                | 5.30±0.08 a                              | 84.37±0.65 a                                 | 2.22±0.02 a |
|             | mM-MOM     | NoF        | 8.02±0.12 a                                        | 2.15±0.06 a                                | 4.06±0.05 d                              | 85.77±0.59 a                                 | 1.89±0.02 b |
|             |            | CF         | 7.55±0.11 b                                        | 2.22±0.07 a                                | 4.25±0.05 c                              | 85.98±0.61 a                                 | 1.91±0.01 b |
|             |            | CF+DM      | 7.41±0.14 b                                        | 2.30±0.08 a                                | 4.48±0.06 b                              | 85.81±0.63 a                                 | 1.95±0.01 a |
|             |            | CF+2DM     | 7.35±0.15 b                                        | 2.39±0.09 a                                | 4.73±0.07 a                              | 85.53±0.60 a                                 | 1.98±0.02 a |
| 10-20 cm    | M(c)POM    | NoF        | 12.85±0.29 a                                       | 2.23±0.03 c                                | 5.62±0.06 c                              | 79.30±0.58 a                                 | 2.52±0.01 b |
|             |            | CF         | 11.95±0.28 a                                       | 2.34±0.03 bc                               | 5.92±0.06 b                              | 79.79±0.56 a                                 | 2.53±0.01 b |
|             |            | CF+DM      | 10.64±0.26 b                                       | 2.44±0.04 ab                               | 6.25±0.07 a                              | 80.67±0.54 a                                 | 2.56±0.02 a |
|             |            | CF+2DM     | 10.58±0.21 b                                       | 2.51±0.04 a                                | 6.44±0.08 a                              | 80.47±0.51 a                                 | 2.57±0.02 a |
|             | mM         | NoF        | 9.97±0.27 a                                        | 2.19±0.03 c                                | 4.81±0.06 b                              | 83.03±0.59 a                                 | 2.20±0.01 b |
|             |            | CF         | 9.81±0.25 a                                        | 2.25±0.03 bc                               | 4.97±0.07 b                              | 82.97±0.61 a                                 | 2.21±0.01 b |
|             |            | CF+DM      | 9.25±0.24 a                                        | 2.34±0.04 ab                               | 5.27±0.08 a                              | 83.14±0.63 a                                 | 2.25±0.01 a |
|             |            | CF+2DM     | 9.14±0.28 a                                        | 2.41±0.04 a                                | 5.49±0.09 a                              | 82.96±0.64 a                                 | 2.28±0.02 a |
|             | M-MOM      | NoF        | 11.86±0.29 a                                       | 2.14±0.03 c                                | 4.68±0.06 d                              | 81.32±0.58 a                                 | 2.19±0.01 b |
|             |            | CF         | 10.72±0.28 b                                       | 2.21±0.04 bc                               | 4.89±0.06 c                              | 82.18±0.56 a                                 | 2.21±0.01 b |
|             |            | CF+DM      | 10.36±0.26 b                                       | 2.29±0.05 ab                               | 5.21±0.08 b                              | 82.14±0.52 a                                 | 2.28±0.01 a |
|             |            | CF+2DM     | 10.25±0.22 b                                       | 2.36±0.06 a                                | 5.46±0.09 a                              | 81.93±0.49 a                                 | 2.31±0.02 a |
|             | mM-POM     | NoF        | 8.25±0.27 a                                        | 2.25±0.03 b                                | 4.71±0.06 d                              | 84.79±0.52 a                                 | 2.09±0.01 b |
|             |            | CF         | 8.14±0.25 a                                        | 2.29±0.03 b                                | 4.84±0.06 c                              | 84.73±0.54 a                                 | 2.11±0.01 b |
|             |            | CF+DM      | 7.98±0.24 a                                        | 2.37±0.04 ab                               | 5.16±0.07 b                              | 84.49±0.57 a                                 | 2.18±0.01 a |
|             |            | CF+2DM     | 7.85±0.20 a                                        | 2.46±0.05 a                                | 5.38±0.08 a                              | 84.31±0.55 a                                 | 2.19±0.01 a |

|          |         |        |              |              |             |              |             |
|----------|---------|--------|--------------|--------------|-------------|--------------|-------------|
| 20-30 cm | mM-MOM  | NoF    | 7.94±0.28 a  | 2.21±0.03 d  | 4.04±0.03 d | 85.81±0.61 a | 1.83±0.01 b |
|          |         | CF     | 7.49±0.26 a  | 2.28±0.03 bc | 4.22±0.04 c | 86.01±0.62 a | 1.85±0.01 b |
|          |         | CF+DM  | 7.35±0.25 a  | 2.36±0.05 ab | 4.56±0.05 b | 85.73±0.60 a | 1.93±0.02 a |
|          |         | CF+2DM | 7.26±0.24 a  | 2.47±0.07 a  | 4.79±0.06 a | 85.48±0.59 a | 1.94±0.02 a |
|          | M(c)POM | NoF    | 12.24±0.29 a | 2.28±0.03 b  | 5.52±0.06 d | 79.96±0.62 a | 2.42±0.02 b |
|          |         | CF     | 11.51±0.27 a | 2.39±0.04 b  | 5.85±0.07 c | 80.25±0.64 a | 2.45±0.02 b |
|          |         | CF+DM  | 10.06±0.25 b | 2.51±0.04 a  | 6.29±0.08 b | 81.14±0.66 a | 2.51±0.03 a |
|          |         | CF+2DM | 9.98±0.22 b  | 2.59±0.05 a  | 6.53±0.08 a | 80.90±0.67 a | 2.52±0.03 a |
|          | mM      | NoF    | 9.91±0.29 a  | 2.25±0.04 c  | 4.94±0.06 c | 82.90±0.59 a | 2.20±0.01 a |
|          |         | CF     | 9.74±0.27 a  | 2.29±0.03 bc | 5.07±0.05 c | 82.90±0.62 a | 2.21±0.01 a |
|          |         | CF+DM  | 9.17±0.28 a  | 2.38±0.03 ab | 5.32±0.07 b | 83.13±0.61 a | 2.24±0.02 a |
|          |         | CF+2DM | 9.08±0.24 a  | 2.47±0.05 a  | 5.56±0.06 a | 82.89±0.57 a | 2.25±0.02 a |
|          | M-MOM   | NoF    | 11.74±0.28 a | 2.23±0.03 b  | 4.89±0.05 d | 81.14±0.56 a | 2.19±0.01 b |
|          |         | CF     | 10.61±0.26 b | 2.29±0.03 b  | 5.06±0.06 c | 82.04±0.52 a | 2.21±0.01 b |
|          |         | CF+DM  | 10.27±0.24 b | 2.34±0.04 b  | 5.28±0.06 b | 82.11±0.49 a | 2.26±0.01 a |
|          |         | CF+2DM | 10.12±0.22 b | 2.46±0.05 a  | 5.58±0.07 a | 81.84±0.51 a | 2.27±0.01 a |
|          | mM-POM  | NoF    | 8.19±0.06 a  | 2.30±0.03 a  | 4.85±0.06 b | 84.66±0.52 a | 2.11±0.01 b |
|          |         | CF     | 8.07±0.06 ab | 2.36±0.03 ab | 5.02±0.07 b | 84.55±0.54 a | 2.13±0.01 b |
|          |         | CF+DM  | 7.85±0.05 bc | 2.44±0.04 bc | 5.27±0.07 a | 84.44±0.59 a | 2.16±0.02 a |
|          |         | CF+2DM | 7.76±0.05 c  | 2.53±0.05 c  | 5.49±0.08 a | 84.22±0.60 a | 2.17±0.02 a |
|          | mM-MOM  | NoF    | 7.79±0.07 a  | 2.28±0.02 c  | 4.18±0.04 d | 85.75±0.56 a | 1.83±0.01 b |
|          |         | CF     | 7.42±0.08 b  | 2.37±0.02 bc | 4.37±0.05 c | 85.84±0.51 a | 1.84±0.01 b |
|          |         | CF+DM  | 7.29±0.06 bc | 2.44±0.03 ab | 4.63±0.06 b | 85.64±0.48 a | 1.90±0.01 a |
|          |         | CF+2DM | 7.14±0.07 c  | 2.52±0.04 a  | 4.87±0.06 a | 85.47±0.63 a | 1.93±0.02 a |

Note: Different lowercase letters within the same column represent significant differences for each soil layer in the same component ( $P < 0.05$ , Tukey's HSD test).
