# Supplementary material for: Increased Soil Aggregate Stability by Altering Contents and Chemical Composition of Organic Carbon Fractions via Seven Years of Manure Addition in Mollisols
Source: MDPI journal article supplement (doi:10.3390/agriculture13010088), 2022-12-28
Supplement: s1 [file s1]

Archive with 11 entries (11 files):
- Supplementary materials/Figure S1.pdf
- Supplementary materials/Figure S2.pdf
- Supplementary materials/Figure S3.pdf
- Supplementary materials/Figure S4.pdf
- Supplementary materials/Figure S5.pdf
- Supplementary materials/Figure S6.pdf
- Supplementary materials/Table S1.pdf
- Supplementary materials/Table S2.pdf
- Supplementary materials/Table S3.pdf
- Supplementary materials/Table S4.pdf
- Supplementary materials/Table S5.pdf
