# Supplementary figures and images for: Increased Soil Aggregate Stability by Altering Contents and Chemical Composition of Organic Carbon Fractions via Seven Years of Manure Addition in Mollisols
Source: MDPI journal article supplement (doi:10.3390/agriculture13010088), 2022-12-28

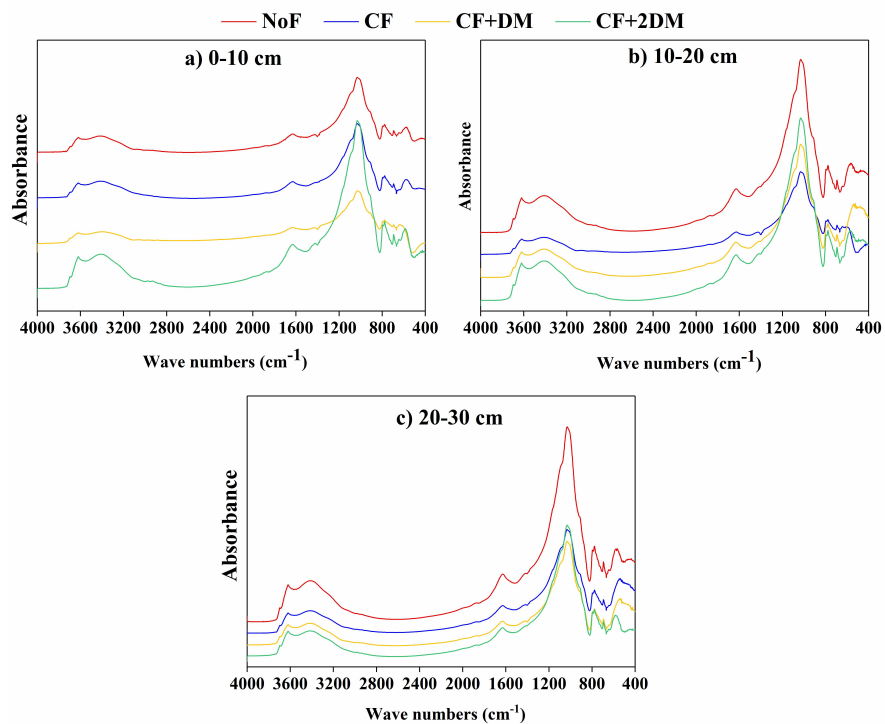

**Figure S3.** Fertilization effects on FTIR of bulk Mollisols.

Supplement: s1 [file s1]
